# Supplementary material for: Predicting Bitcoin price movement through Sentiment Analysis: A Comprehensive Study
Source: Atypon-hosted journal article supplement (doi:10.1145/3663741.3664791), 2024-06-01
Supplement: bidede24_7_presentation.pdf [file bidede24_7_presentation.pdf]

**PREDICTING BITCOIN PRICE MOVEMENT  
THROUGH SENTIMENT ANALYSIS: A  
COMPREHENSIVE STORY**

Hanh Nguyen Phuong

Asefeh Asemi

Mutaz Alshafeey

Institute of Information Technology

Corvinus University of Budapest

# AGENDA

**01**

**INTRODUCTION**

**02**

**RESEARCH QUESTIONS**

**03**

**LITERATURE REVIEW**

**04**

**METHODOLOGY**

**05**

**EXPERIMENTAL RESULTS**

**06**

**LIMITATION**

**07**

**SUMMARY**

**08**

**BIBIOGRAPHY**

# INTRODUCTION

- **Supply and demand interactions**
- **Volatility and Investor Behavior**
- **The Role of Twitter**
- **Sentiment Analysis (SA)**

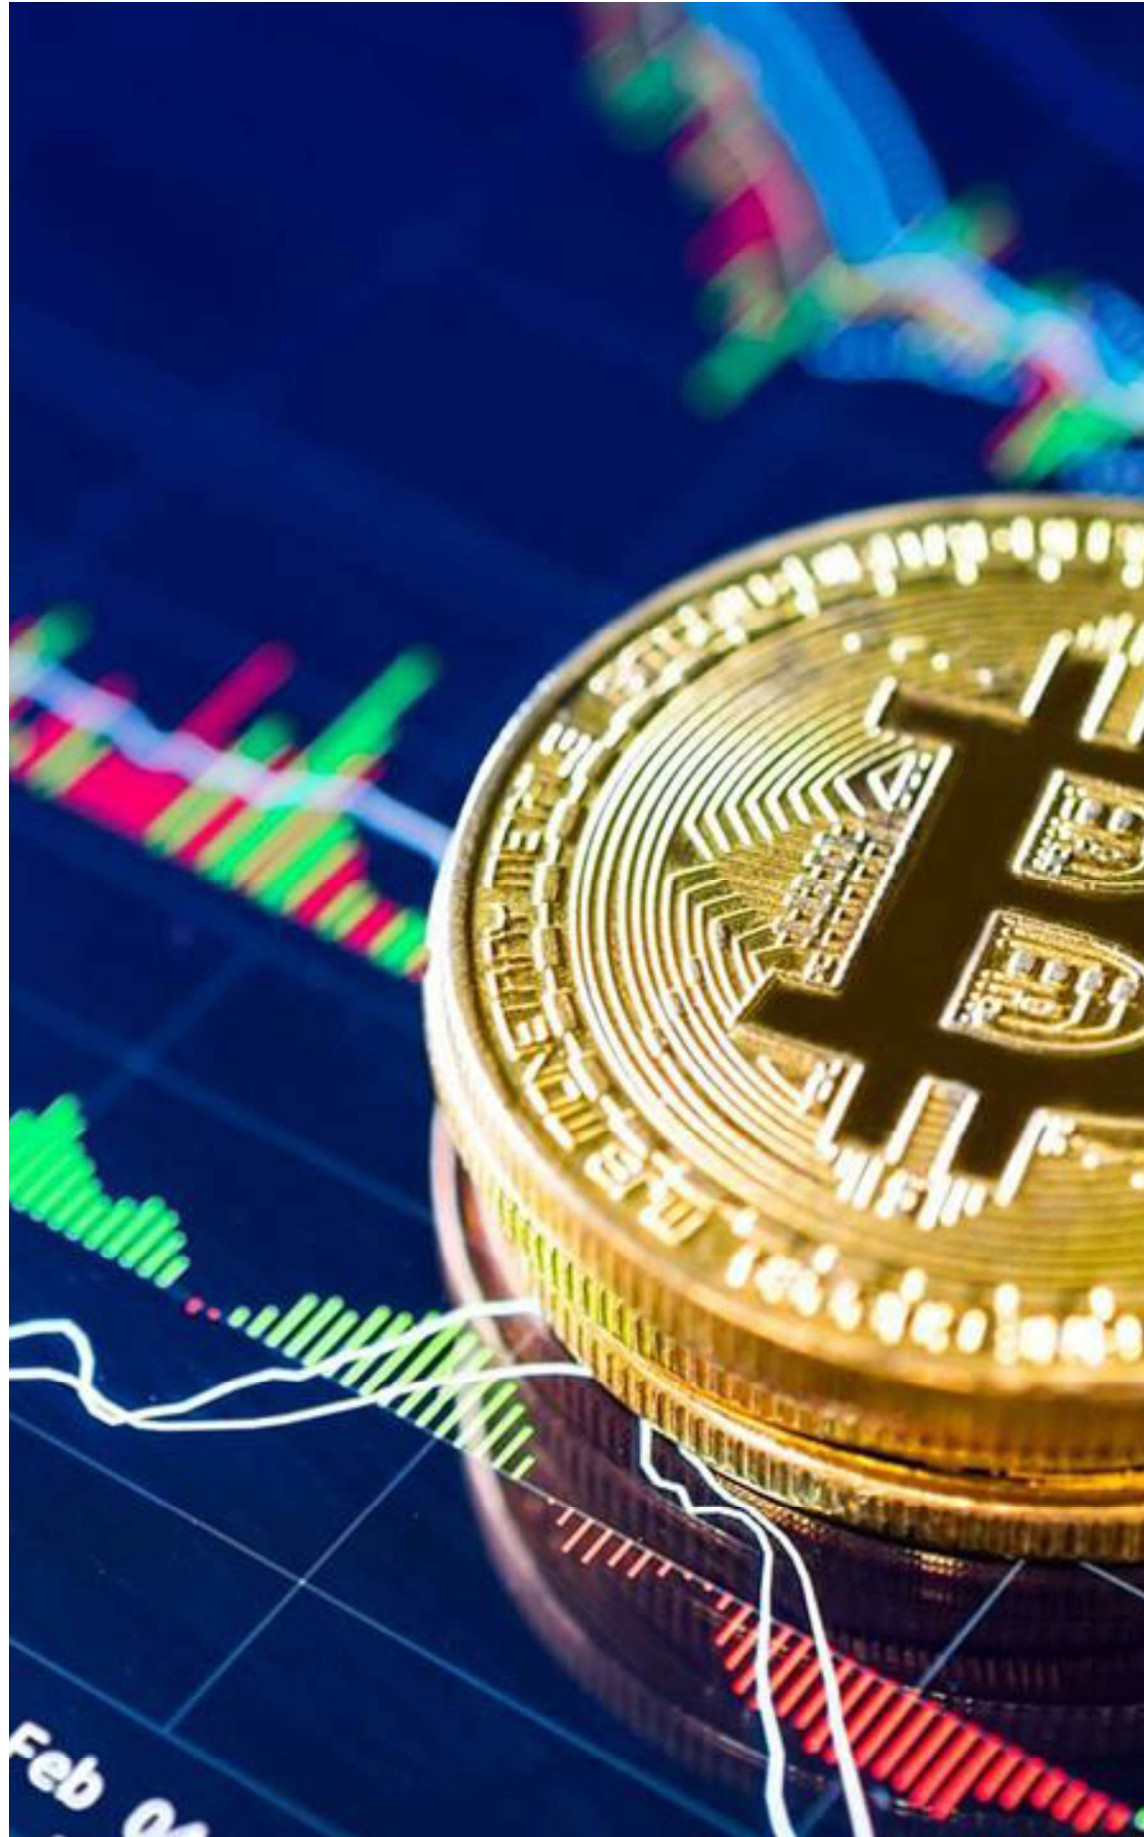



# RESEARCH QUESTIONS

**Main Aim:** The study focuses on exploring the effect of sentiment derived from Twitter on the price movement of Bitcoin and find the optimal time to lead the best prediction.

## 01

To what extent does sentiment expressed in Tweets significantly impact on Bitcoin price movement?

## 02

Which prediction model demonstrates the most accurate prediction for Bitcoin price movement?

## 03

What is the optimal time lag that significantly influences the accuracy of Bitcoin price movement?

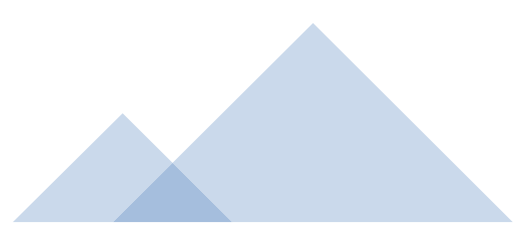

# LITERATURE REVIEW

| Research                                                                            | Key Findings and Research gap                                                                                                                                                       |
|-------------------------------------------------------------------------------------|-------------------------------------------------------------------------------------------------------------------------------------------------------------------------------------|
| Ye et al, 2022; Low et al, 2024                                                     | Inclusion of sentiment data enhances prediction model performance.                                                                                                                  |
| Bidirectional Encoder Representations from Transformers (BERT) (Devlin et al, 2018) | BERT method enhances context understanding and offers a pre-trained model adaptable for various downstream tasks.                                                                   |
| RoBERTa Variants with different domain-specific knowledge                           | Two RoBERTa variants trained on large Twitter datasets introduced by Jose et al, 2022, and Juan et al, 2021. There's a lack of direct effectiveness comparison in previous studies. |
| Trend in Cryptocurrency Price Prediction (Murray et al, 2023; Jaquart et al, 2022)  | DL models, particularly LSTM, GRU, and BiLSTM, are favored due to their capacity to capture complex data relationships.                                                             |
| Time lags concept (Critien et al, 2022)                                             | Previous studies used defined time lags. But no studies investigate how time lags affect the prediction models                                                                      |

# METHODOLOGY (1/3)

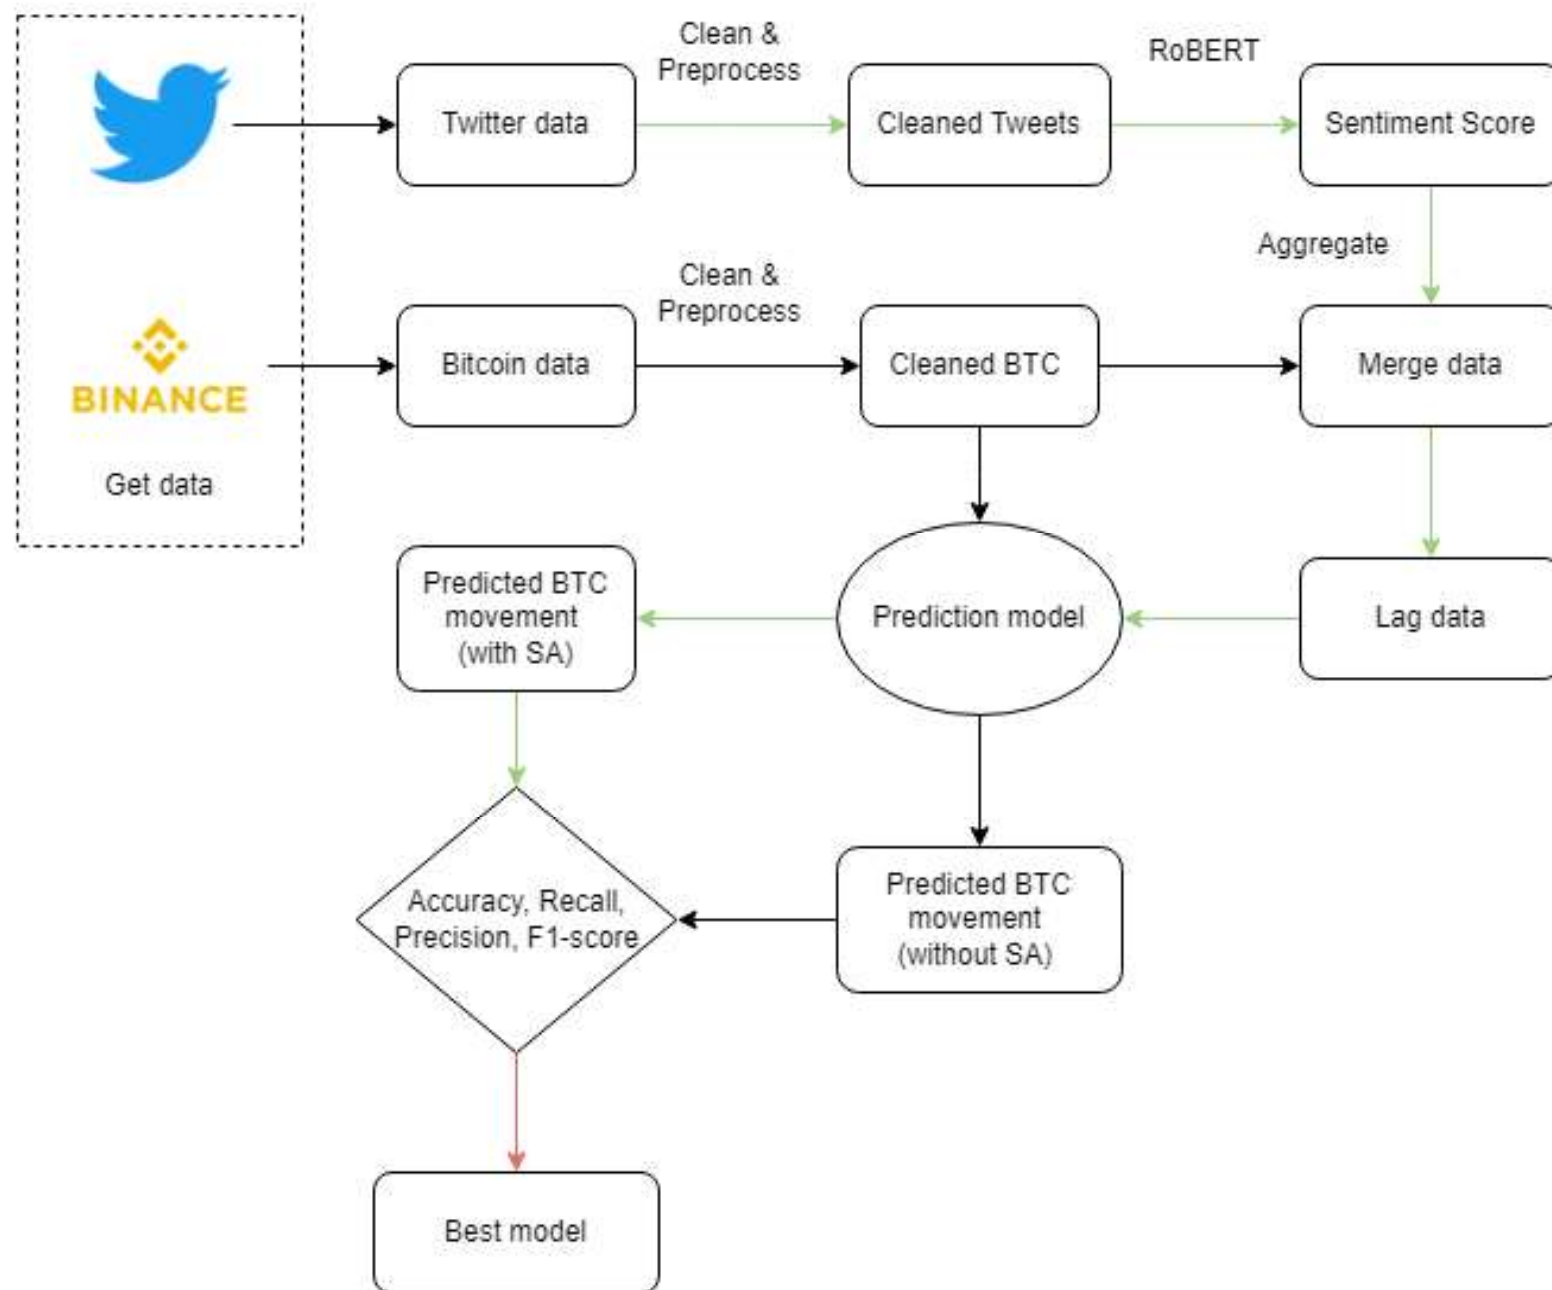

Data Preparation to Forecast by Twitter Sentiment (Source: Author)

**Problem Framing:** Predicting Bitcoin price movement as binary classification.

**SA and non-SA scenarios:** Utilizing sentiment analysis (SA) as a multivariate forecasting method, non-SA as a univariate forecasting method.

**Sentiment Scores:** Extracted from RoBERTa models introduced by Jose et al. (2022) and Juan et al. (2021) for Twitter data.

**Statistical Methods:** Employing Augmented Dickey-Fuller test (ADF) and Autocorrelation for analysis.

**Prediction Models:** Three neural network (NN) models utilized - LSTM, GRU, and BiLSTM - after data preparation.

# METHODOLOGY (2/3)

## DATA ACQUISITION AND PROCESSING

**Bitcoin Price:** Gathered from Binance API at 1-hour intervals.

**Real-time Twitter Data:** Retrieved via tweepy Python library from Twitter API v2, filtering for English tweets containing "btc" or "bitcoin".

**Twitter Dataset:** Initially 285,405 tweets, reduced to over 285,000 after cleaning.

**Timeframe:** Data spans January 31, 2023, to June 6, 2023.

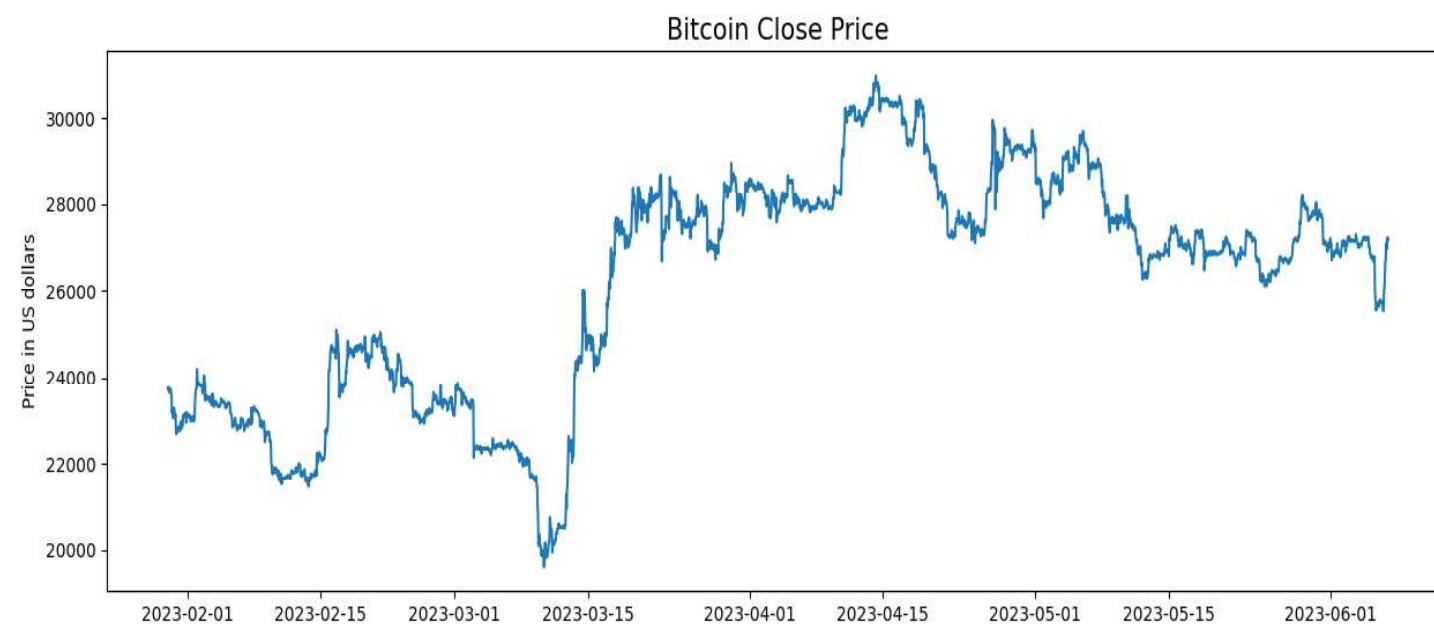

Bitcoin close price per day ( Source: Author)

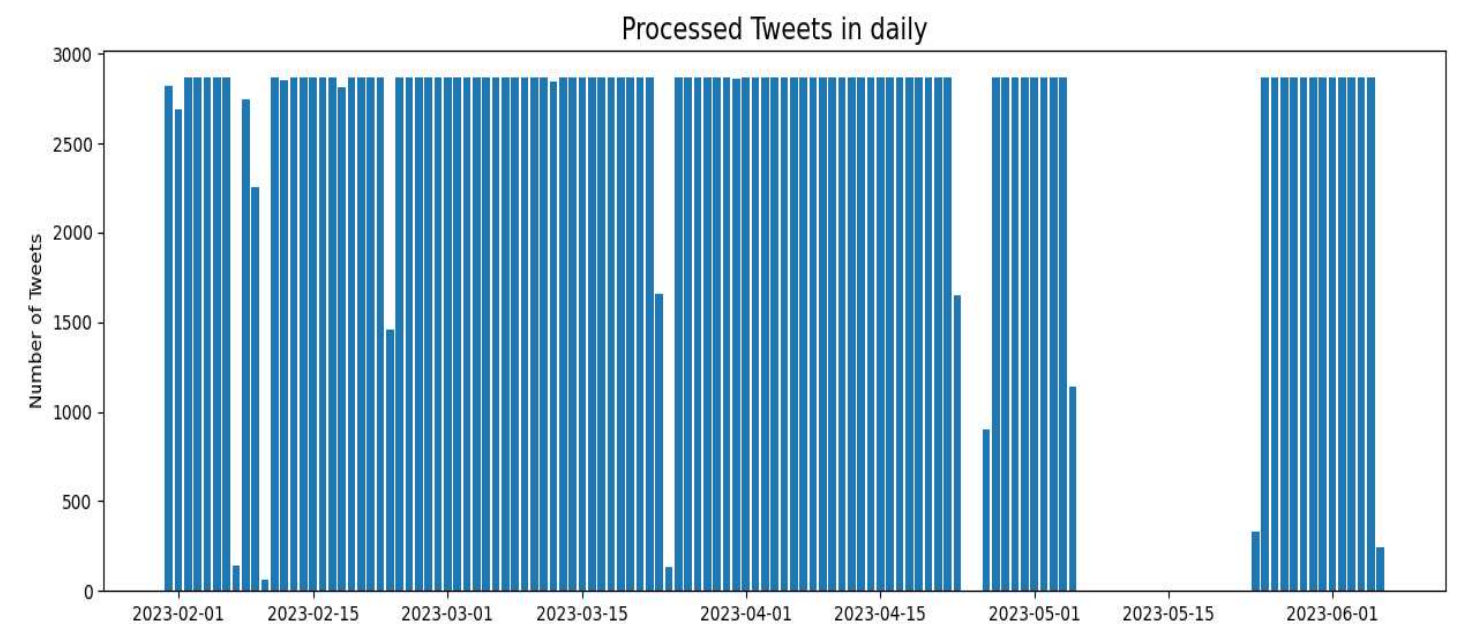

Number of processed tweets per day (Source: Author)

# METHODOLOGY (3/3)

## INTRODUCING LAG

**Continuous Time Lags:** Investigation spans from 2 to 17 hours to determine optimal lag for prediction model performance in both scenarios.

**Lagged Datasets:** Training instances encompass observations from preceding days, corresponding to the lag duration. For instance, a lag of 2 includes data from the previous 2 days.

ORIGINAL

| Hour | F1 (target) | F2  | F3  |
|------|-------------|-----|-----|
| H1   | 1           | 0.1 | 0.2 |
| H2   | 0           | 0.3 | 0.4 |
| H3   | 1           | 0.5 | 0.6 |
| H4   | 0           | 0.7 | 0.8 |
| H5   | 1           | 0.9 | 0.1 |

MODIFIED

| Hour | f1(t-2) | f2(t-2) | f3(t-2) | f1(t-1) | f2(t-1) | f3(t-1) | f1(t) |
|------|---------|---------|---------|---------|---------|---------|-------|
| H3   | 1       | 0.1     | 0.2     | 0       | 0.3     | 0.4     | 1     |
| H4   | 0       | 0.3     | 0.4     | 1       | 0.5     | 0.6     | 0     |

F1: target movement (up:1, down: 0)  
lag is 2 so all observations from last 2 days are variables for prediction.  
At H3, f1(t) is the actual target movement. We train all observations within 2 last days to predict the movement at H3.

Dataset with lagging feature of 2-hour lag (Source: Author)



# RESULTS (1/4)

## RESULTS OF STATISTICAL ANALYSIS

**Non-Stationary Time Series:** ADF test indicates Bitcoin price as non-stationary, with an ADF statistic of -1.4954 and p-value of 0.535780, failing to reject the null hypothesis at 1% critical value.

**Strong Positive Correlation:** Strong positive correlation observed for lags up to 500 hours, indicating a high degree of autocorrelation in the data.

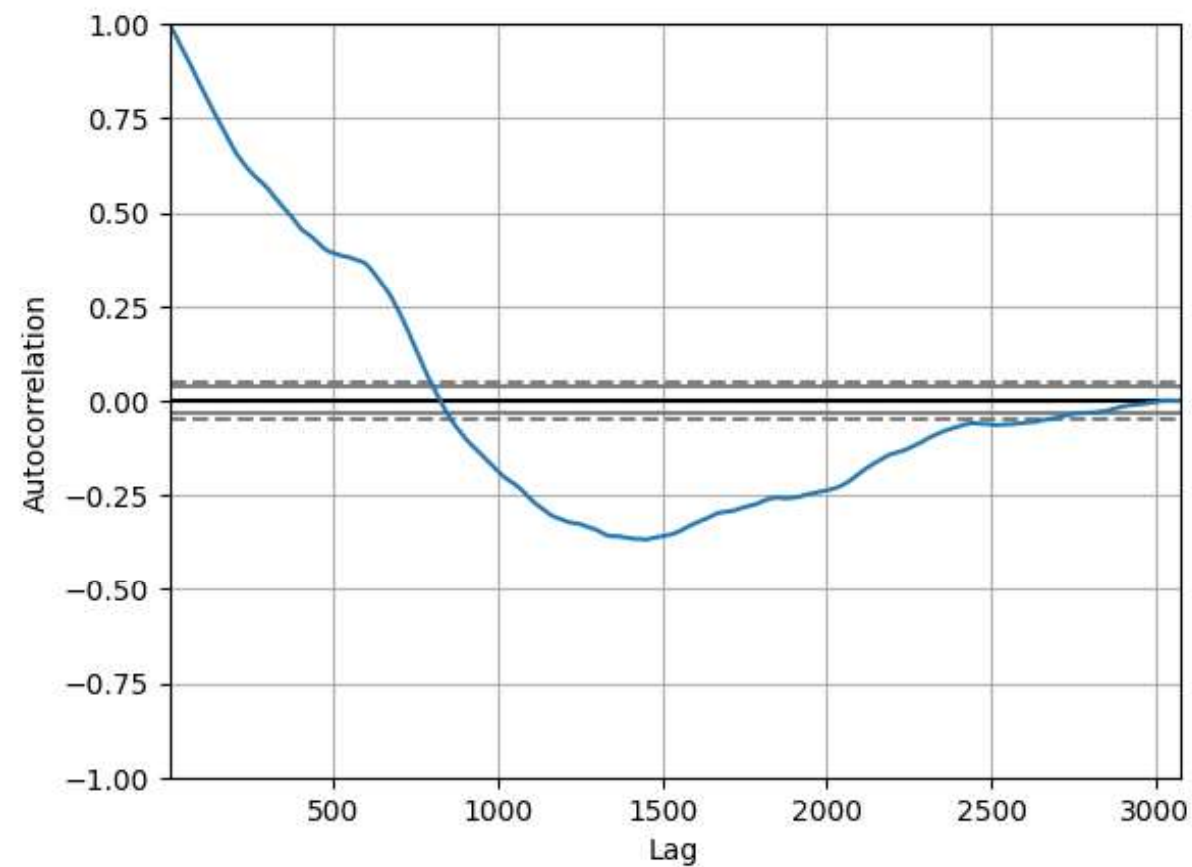

Autocorrelation in whole period (Source: Author)

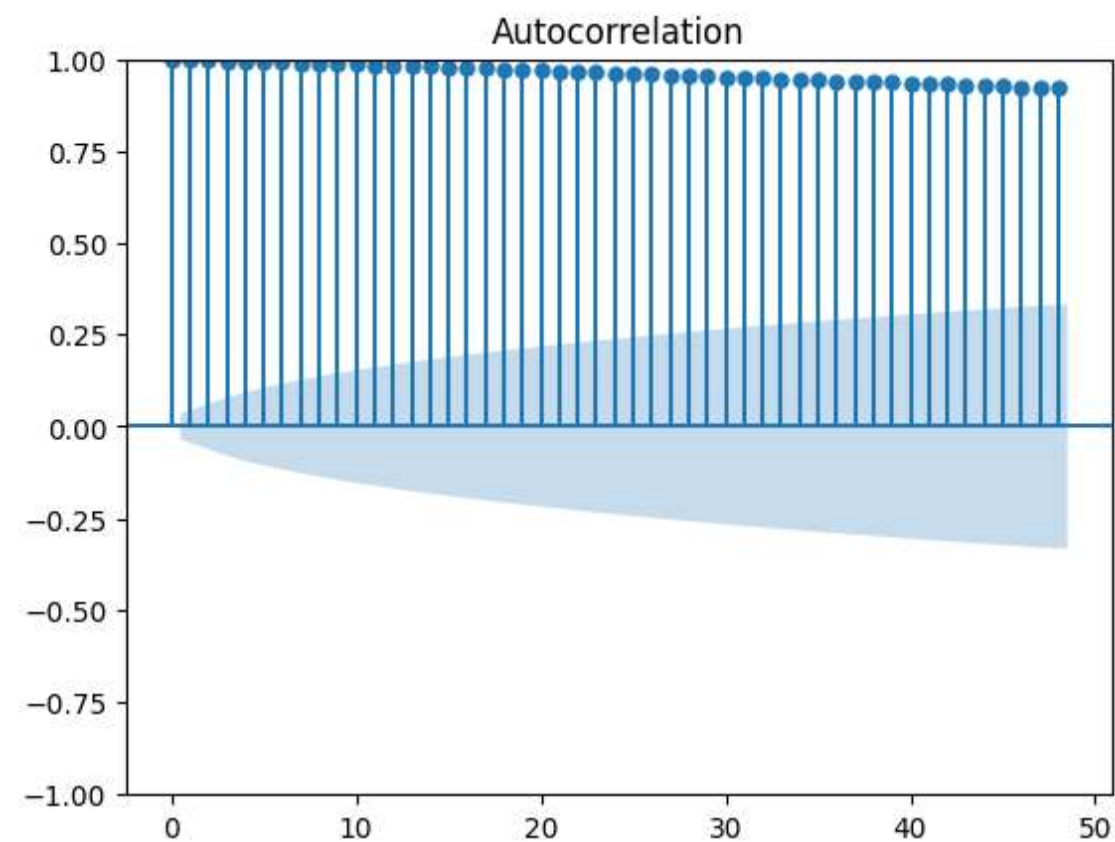

Autocorrelation in 50-hour interval (Source: Author)

# RESULTS (2/4)

## RESULTS OF PRICE MOVEMENT PREDICTION

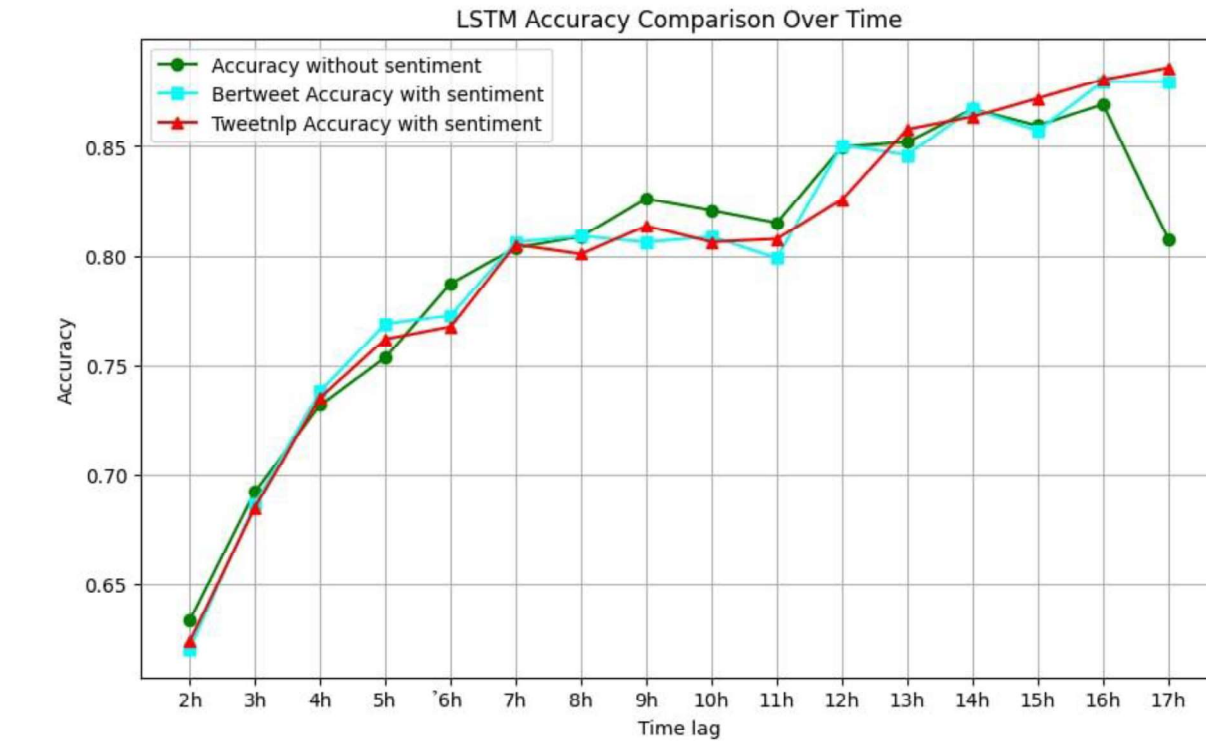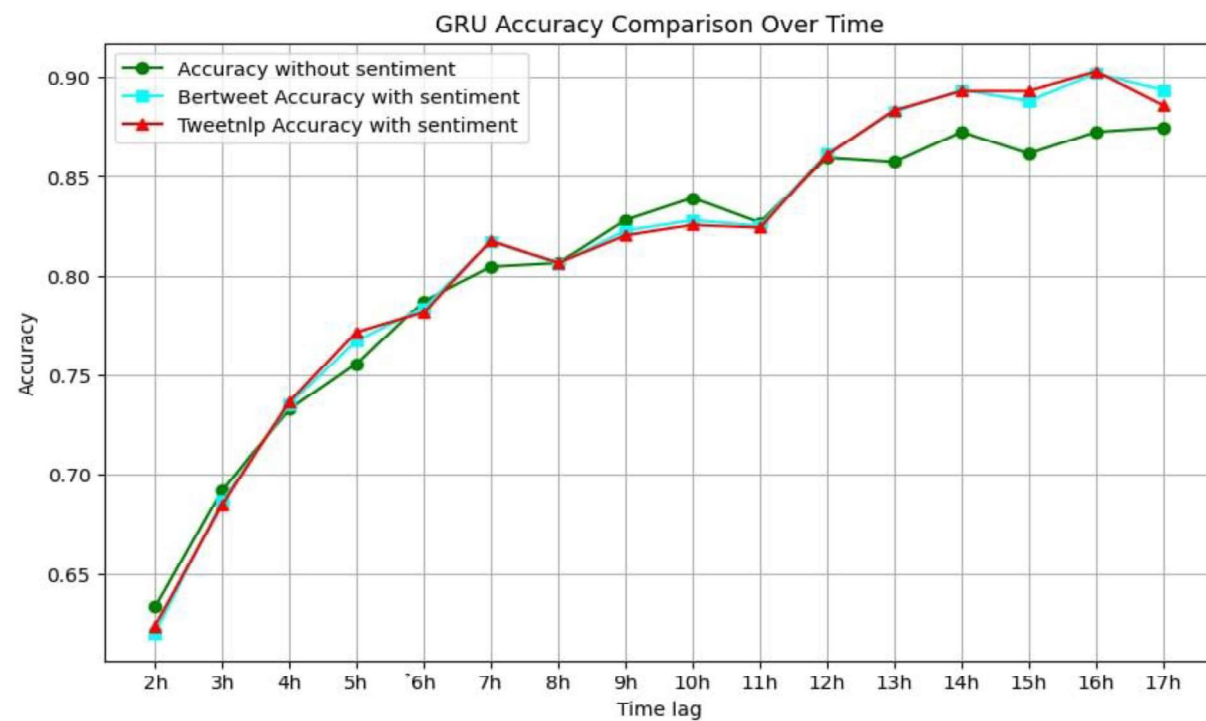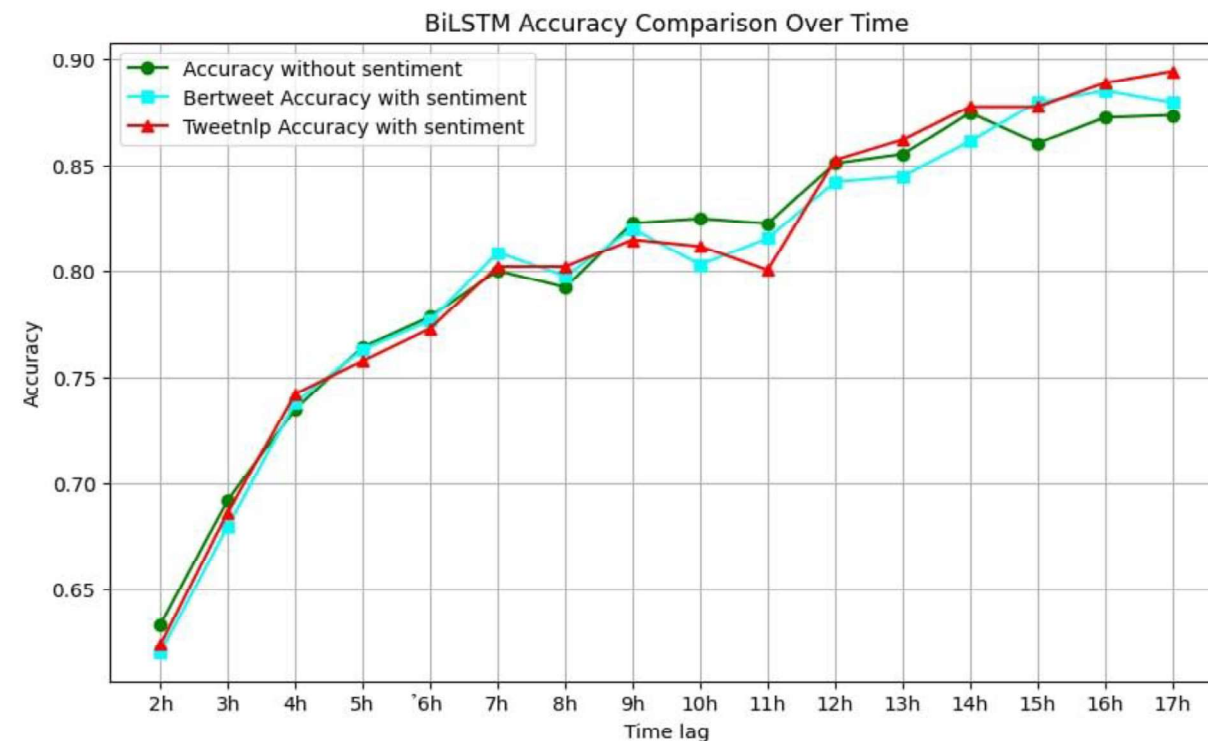

Accuracy results in each model (Source: Author)

**Balanced Data:** Our dataset evenly represents increase and decrease classes, yielding similar accuracy and F1-scores, with focus on accuracy.

**Model Performance:** Initially, SA-lacking models outperform, but sentiment-inclusive models surpass them in accuracy for the last 5 hours.

# RESULTS (3/4)

## RESULTS OF PRICE MOVEMENT PREDICTION

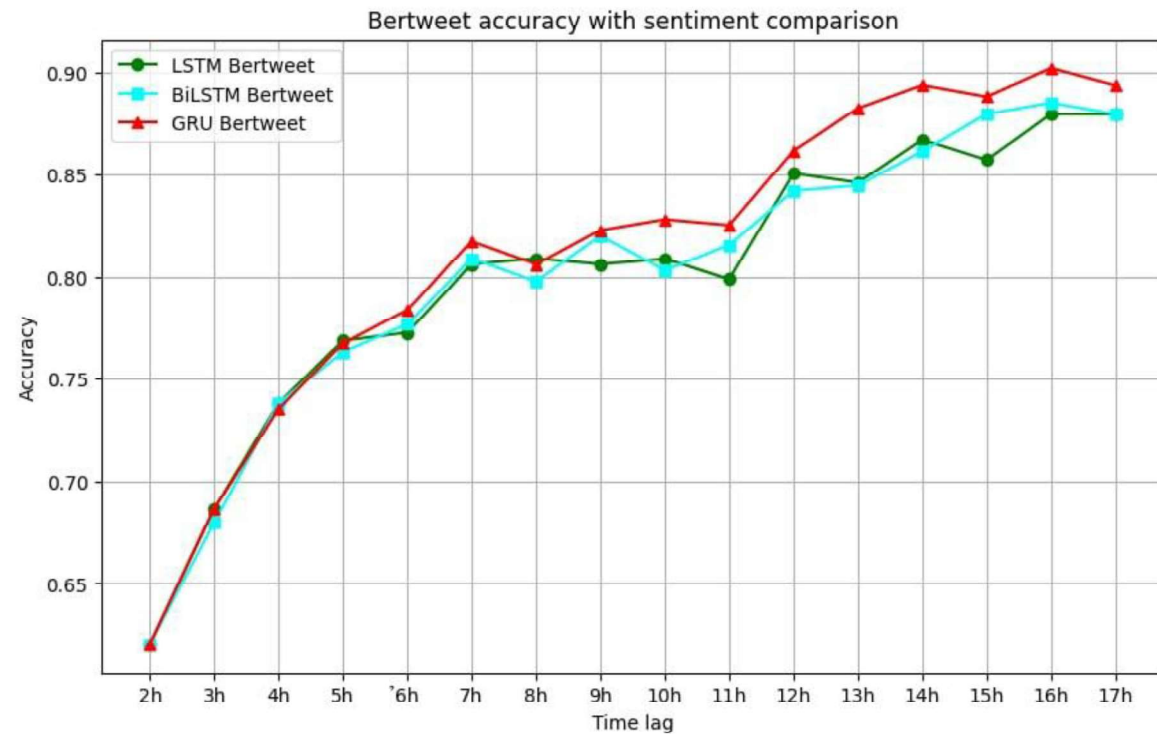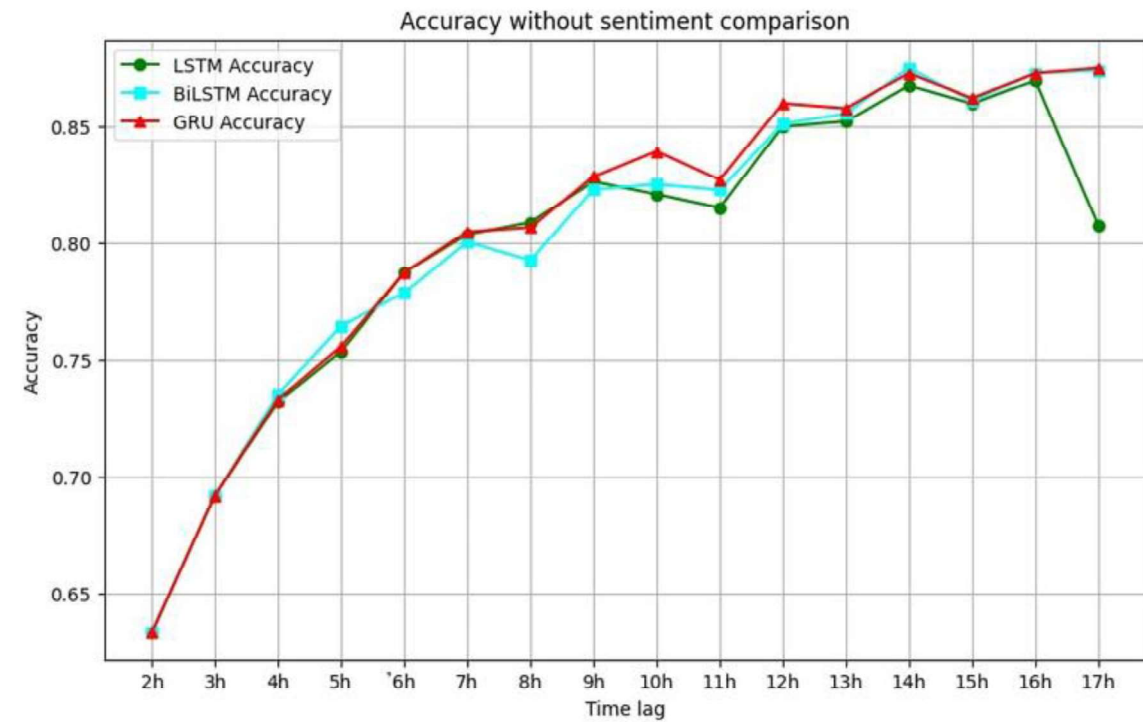

Accuracy results  
in each model  
(Source: Author)

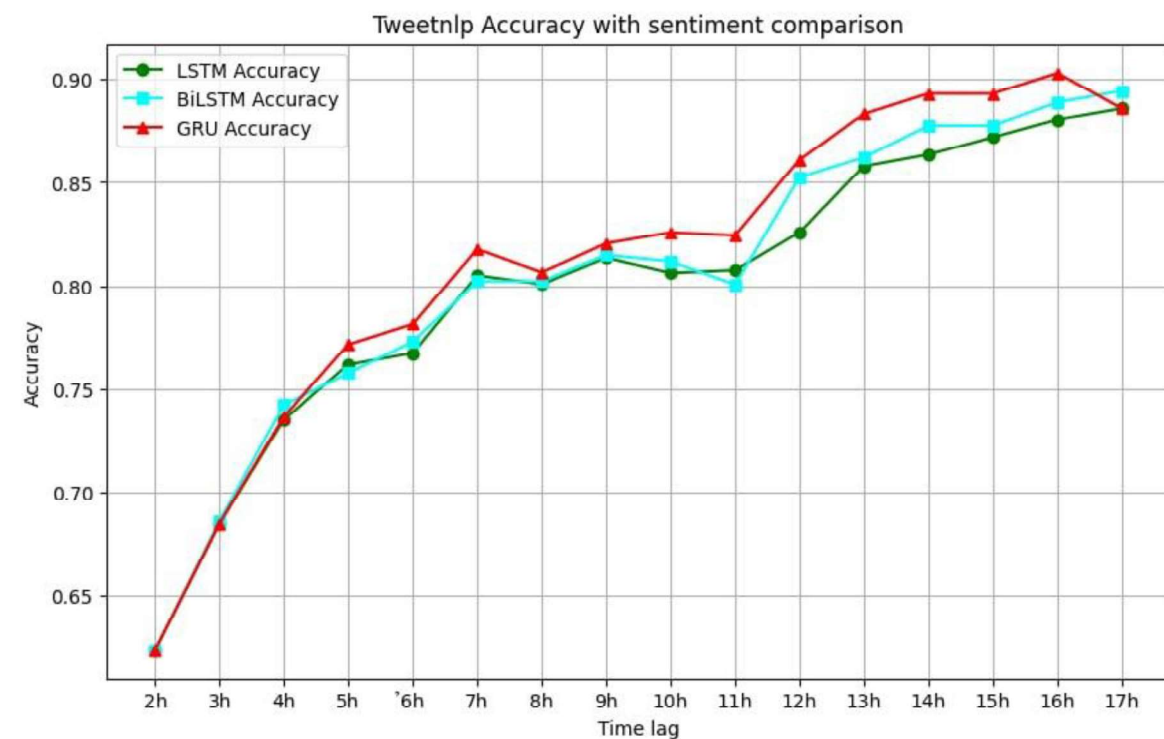

**GRU Superiority:** GRU outperforms LSTM and BiLSTM in both scenarios.

**SA Impact:** Including SA notably enhances model performance for longer time periods (12 hours and beyond).

**Top Accuracy:** GRU with TweetNLP sentiment achieves the highest accuracy at 90.3%, closely followed by GRU with Bertweet sentiment at 90.2%.

# RESULTS (4/4)

## RESULTS OF PRICE MOVEMENT PREDICTION

**Consistent Accuracy:** All models maintain accuracy above 80% after 12 hours, with the inclusion of SA surpassing non-sentiment cases.

**SA Impact:** Highest accuracies observed with SA inclusion, notably with GRU leading, followed by BiLSTM with TweetNLP sentiment achieving 89.44% accuracy.

**Small Accuracy Difference:** The accuracy gap between sentiment and non-sentiment scenarios remains relatively small, below 2%.

**GRU Superiority:** Significant accuracy gap observed for GRU model from 13 to 16 hours, surpassing other models by 2% to 3%.

**Consistent SA Performance:** Accuracy difference between SA datasets remains around 1%.

# LIMITATION

- **Limited Feature Scope:** Focus solely on Twitter sentiment attributes.
- **English Tweets Only:** Collecting exclusively English Tweets.
- **Missing Criteria:** Unable to incorporate user interaction due to API restriction.
- **Timeframe Restriction:** Analysis confined to specific time intervals.

# CONCLUSION

**Impact of Sentiment on Bitcoin Price:** Sentiment expressed in Tweets notably influences Bitcoin price changes, particularly over 12 hours or longer.

**Model Performance with Sentiment Analysis:** Incorporating sentiment analysis (SA) led to the highest accuracy (90.3%) using a 2-layer GRU model with TweetNLP sentiment at a 16-hour lag.

**Comparative Analysis of Prediction Models:** GRU outperformed LSTM and BiLSTM models in both sentiment and non-sentiment scenarios, achieving a maximum accuracy of 87.47% (non-sentiment) and 90.3% (with SA) at specific time lags.

**Optimal Time Lag Influence:** Results suggest optimal lag times of 16 hours and 17 hours within the limited timeframe analyzed, but longer datasets may yield different optimal lag times.

# REFERENCES

- Ladislav, K. (2015). What Are the Main Drivers of the Bitcoin Price? Evidence from Wavelet Coherence Analysis.
- Georgoula et al. (2015). Using Time-Series and Sentiment Analysis to detect the determinants of Bitcoin Prices.
- Serafini et al. (2020, July). Sentiment-Driven Price Prediction of the Bitcoin based on Statistical and Deep Learning Approaches. International Joint Conference on Neural Networks (IJCNN), 19 - 24.  
doi:10.1109/IJCNN48605.2020.9206704
- Ye et al. (2022). A Cryptocurrency Price Prediction Model Based on Twitter Sentiment Indicators. Communications in Computer and Information Science. doi:10.1007/978-981-19-0852-132
- Low et al. (2024). Deep Learning and Sentiment Analysis-Based Cryptocurrency Price Prediction. Advances in Visual Informatics. doi:10.1007/978-981-99-7339-24
- Critien et al. (2022). Bitcoin price change and trend prediction through twitter sentiment and data volume. Financial Innovation.
- Murray et al. (2023). On Forecasting Cryptocurrency Prices: A Comparison of Machine Learning, Deep Learning, and Ensembles. Forecasting. 196-209. doi:10.3390/forecast5010010
- Jaquart et al. (2022). Machine learning for cryptocurrency market prediction and trading. The Journal of Finance and Data Science, 331-352. doi:10.1016/j.jfds.2022.12.001
- Jose et al. (2022). TweetNLP: Cutting-Edge Natural Language Processing for Social Media. the 2022 Conference on Empirical Methods in Natural Language Processing: System Demonstrations. doi:10.18653/v1/2022.emnlp-demos.5
- Juan et al. (2021). pysentimiento: A Python Toolkit for Opinion Mining and Social NLP tasks. Computation and Language. doi:10.48550/arXiv.2106.09462

**THANK YOU**
